# Supplementary material
Source: Springer Nature journal article supplement (https://www.springermedizin.de/resource/supplementary/12888_2011_961_MOESM1_ESM.pdf/9479356)

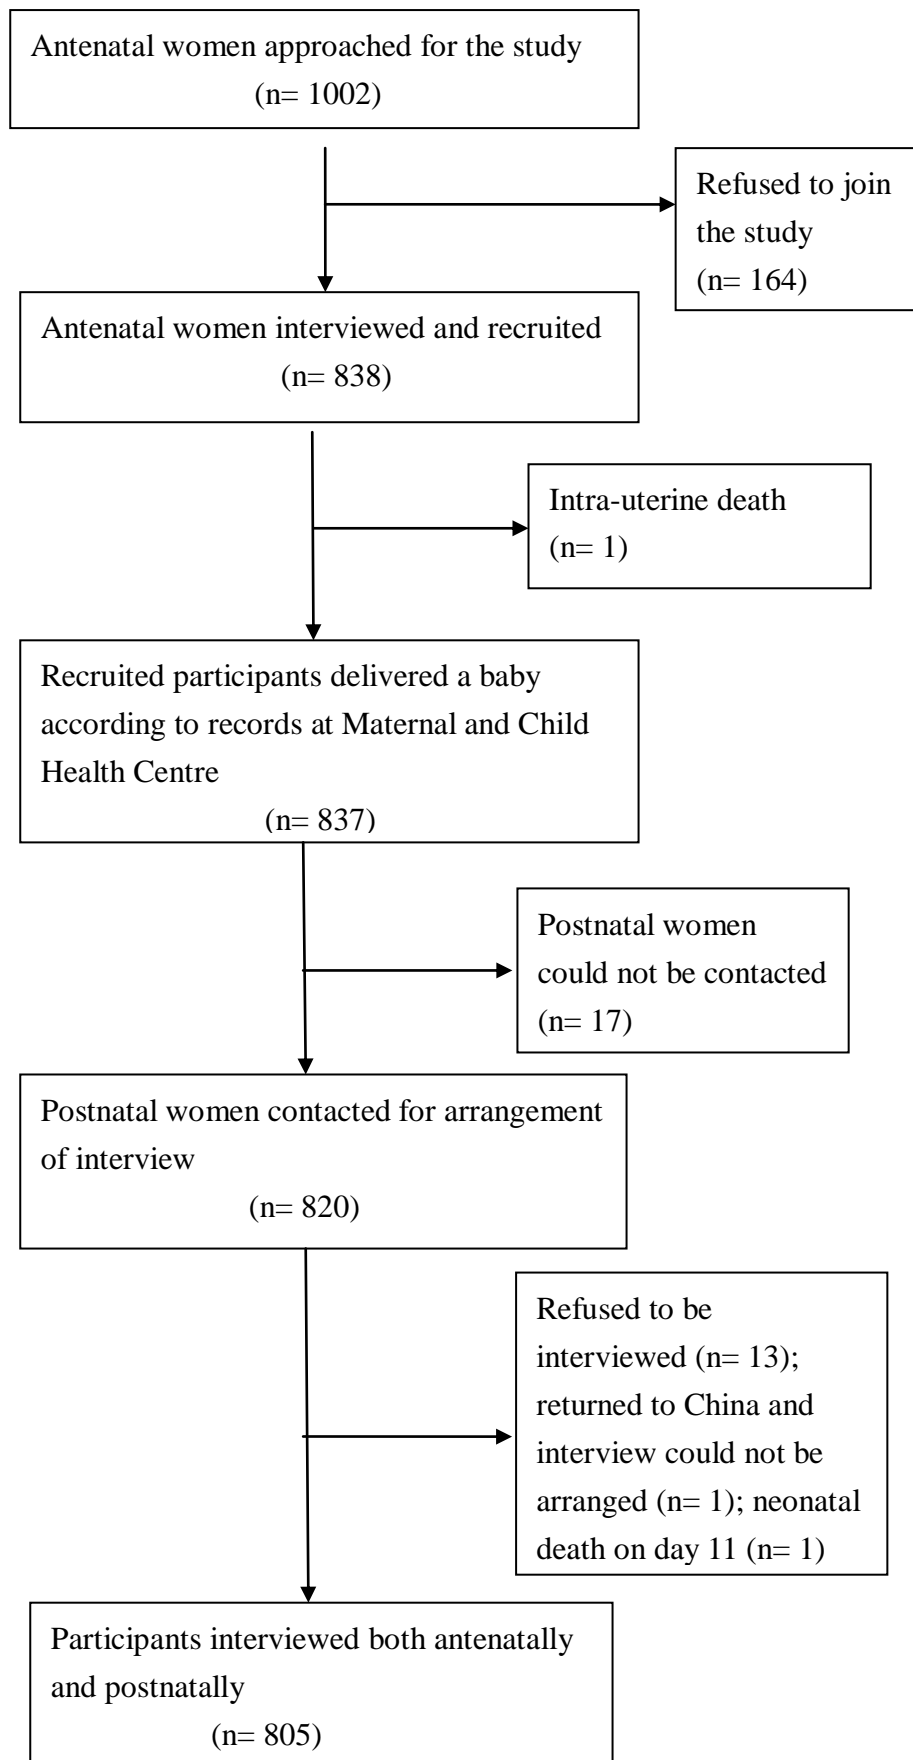

**Fig. 1** Flow chart of participants interviewed

Supplement: MOESM1 [file 9479356]
